# Supplementary material
Source: PubMed Central journal article supplement (PMC9731247)
Supplement: 0449.pdf [file 0449.pdf]

Table 2. Description of 5 patients with MCD

| Patient | Age | Sex | Curacao | Mutation   | bAVM | pAVM     | MCD                                                                                                                                    | Symptoms                                |
|---------|-----|-----|---------|------------|------|----------|----------------------------------------------------------------------------------------------------------------------------------------|-----------------------------------------|
| 1       | 26  | F   | 4       | ENG        | No   | Yes      | Right parietal occipital polymicrogyria and closed lip schizencephaly                                                                  | Migraine headaches                      |
| 2       | 20  | M   | 4       | Not Tested | No   | No       | Right frontoparietal closed lip schizencephaly; right frontotemporal parietal polymicrogyria                                           | Migraine headaches                      |
| 3       | 80  | M   | 4       | ENG        | Yes  | Possible | Left perirolandic polymicrogyria; nodular heterotopia about a left perirolandic porencephalic cavity; left superior temporal gyrus AVM | None                                    |
| 4       | 18  | M   | 4       | ENG        | Yes  | Probable | Right parietal polymicrogyria; right parietal AVM                                                                                      | Migraine headaches; right hand weakness |
| 5       | 28  | M   | 4       | ENG        | No   | Yes      | Left superior frontal gyrus polymicrogyria                                                                                             | None                                    |
